# Supplementary material for: MicroRNA Regulation of Bovine Monocyte Inflammatory and Metabolic Networks in an In Vivo Infection Model
Source: PubMed Central journal article supplement (PMC4065264; doi:10.1534/g3.113.009936), 2014-01-23
Supplement: supp_g3.113.009936_FigureS2.pdf [file supp_g3.113.009936_FigureS2.pdf]

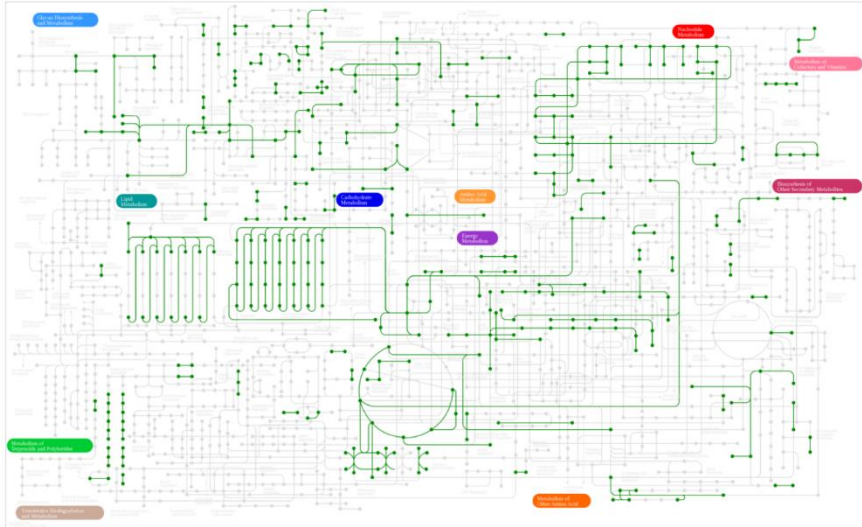

**Figure S2** Down-regulated genes highlighted on the KEGG metabolism network.
